# Supplementary material for: A wire-shaped flexible asymmetric supercapacitor based on carbon fiber coated with a metal oxide and a polymer
Source: Royal Society of Chemistry journal article supplement (doi:10.1039/c5ta01105a), 2015-01-01
Supplement: c5ta01105a1.pdf [file c5ta01105a1.pdf]

Supplementary Information for

**Wire-shaped Flexible Asymmetric Supercapacitor based on  
Carbon Fiber coated with Metal oxide & Polymer**

Weijie Liu, Nishuang Liu,\* Yuling Shi, Ying Chen, Congxing Yang, Jiayou Tao,  
Siliang Wang, Yumei Wang, Jun Su, Luying Li and Yihua Gao\*

Center for Nanoscale Characterization & Devices (CNCD), Wuhan National  
Laboratory for Optoelectronics (WNLO)-School of Physics, Huazhong University of  
Science and Technology (HUST), 1037 Luoyu Road, Wuhan 430074, China

1. The areal capacitance of the Wire-shaped Fiber Asymmetric Supercapacitor (WFASC) can be calculated from the cyclic voltammetry curves via the following formulae:

$$C = A / (2 \times S \times \Delta U) \quad (1)$$

$$C_{\Delta S} = C / \Delta S = A / (2 \times S \times \Delta U \times \Delta S) \quad (2)$$

where  $C$  is the capacitance of the WFASC,  $A$  is the area of CV curve,  $S$  is the scan rate,  $\Delta U$  is the potential window,  $C_{\Delta S}$  is the areal capacitance, and  $\Delta S$  is the area of the electrodes.

2. The areal capacitance of the WFASC can be calculated from the galvanostatic charge-discharge curves via the following formulae:

$$C = Q / \Delta U = I \times \Delta t / \Delta U \quad (3)$$

$$C_{\Delta S} = C / \Delta S = I \times \Delta t / (\Delta U \times \Delta S) \quad (4)$$

where  $C$  is the capacitance of the WFASC,  $I$  is the discharge current,  $\Delta t$  is the discharge time,  $\Delta U$  is the potential window during the discharge process,  $C_{\Delta S}$  is the areal capacitance, and  $\Delta S$  is the area of the electrodes.

3. The energy density and power density of the WFASC can be calculated from the galvanostatic charge-discharge curves via the following formulae:

$$E = 0.5 \times C_{\Delta S} \times (\Delta U)^2 \quad (5)$$

$$P = E / \Delta t \quad (6)$$

where  $E$  is the energy density,  $C_{\Delta S}$  is the areal capacitance,  $\Delta U$  is the potential window,  $P$  is the areal power density and  $\Delta t$  is the discharge time.

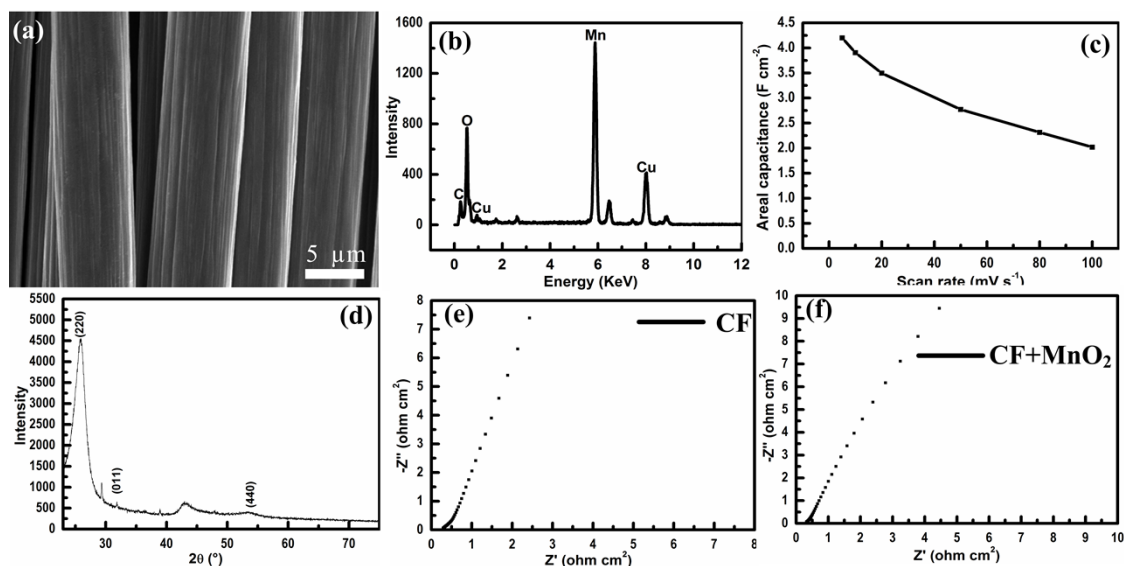

Fig. S1 (a) the SEM image of pure carbon fiber; (b) the EDX spectrum of  $\text{MnO}_2$ -carbon fiber; (c) areal capacitances of the positive electrode measured by the CV experiment with the scan rate from  $5 \text{ mV s}^{-1}$  to  $100 \text{ mV s}^{-1}$ ; (d) the XRD of  $\text{MnO}_2$ -carbon fiber; (e) and (f) are EIS of pure carbon fiber and  $\text{MnO}_2$ -carbon fiber.

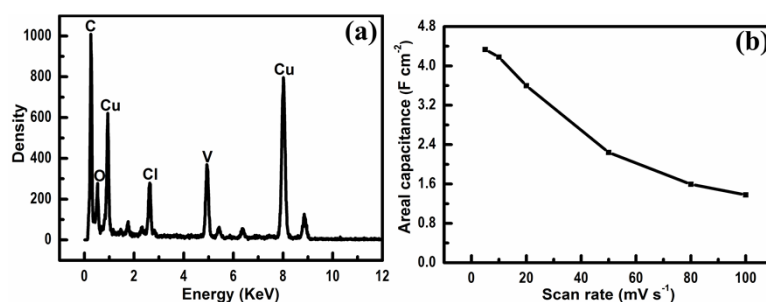

Fig. S2 (a) the EDX spectrum of  $\text{V}_2\text{O}_5$ -PANI-carbon fiber; (b) areal capacitances of the negative electrode measured by the CV experiment with the scan rate from  $5 \text{ mV s}^{-1}$  to  $100 \text{ mV s}^{-1}$ .

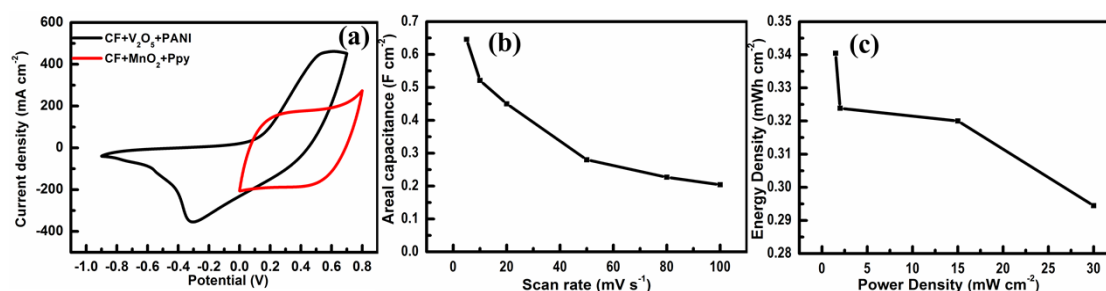

Fig. S3 (a) comparison of CV curves of negative and positive electrodes performed in a three-electrode cell; (b) areal capacitances of the WFASC measured by the CV experiment with the scan rate from  $5 \text{ mV s}^{-1}$  to  $100 \text{ mV s}^{-1}$ ; (c) energy density and power density plot.
